# Supplementary material
Source: Springer Nature journal article supplement (https://www.springermedizin.de/resource/supplementary/12936_2007_491_MOESM2_ESM.pdf/9547872)

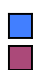

Arsucam one intake/day

Arsucam 2 intakes/day

### % Apyretic patients between D1 and D14

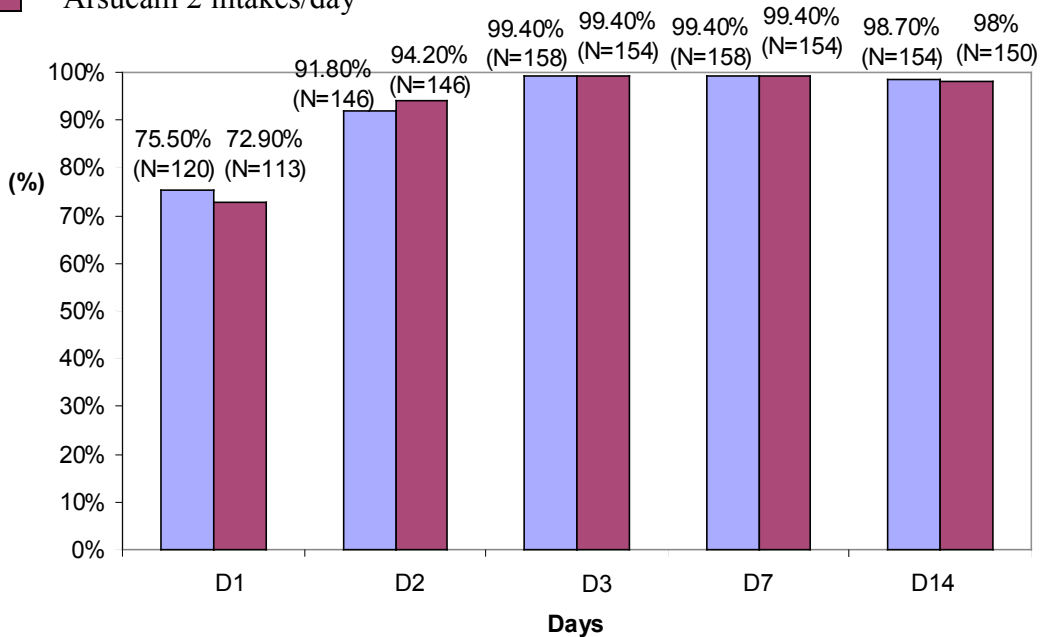

Supplement: MOESM2 [file 9547872]
